# Supplementary material for: Dynamic porous coordination polymers built-up from flexible 4,4′-dithiodibenzoate and rigid N-based ligands
Source: Royal Society of Chemistry journal article supplement (doi:10.1039/d0dt02411b), 2020-01-01
Supplement: d0dt02411b1.pdf [file d0dt02411b1.pdf]

**Electronic Supporting Information for:**

**Dynamic porous coordination polymers built-up from  
flexible 4,4'-dithiodibenzoate and rigid N-based ligands**

Najmeh Jarrah,<sup>a,b</sup> Javier Troyano,<sup>\*a</sup> Arnau Carne,<sup>a</sup> Inhar Imaz,<sup>a</sup> Shahram Tangestaninejad,<sup>b</sup> Majid  
Moghadam<sup>\*b</sup> and Daniel Maspoch<sup>\*a,c</sup>

<sup>a</sup> Catalan Institute of Nanoscience and Nanotechnology (ICN2), Campus UAB, Bellaterra, 08193

Barcelona, Spain

<sup>b</sup> Department of Chemistry, University of Isfahan, Isfahan 81746-73441, Iran

<sup>c</sup> ICREA, Pg. Lluís Companys 23, 08010 Barcelona, Spain

**Table S1.** Data collection and structure refinement for **1**

|                                                              |                                                                                        |
|--------------------------------------------------------------|----------------------------------------------------------------------------------------|
| Identification code                                          | <b>1</b>                                                                               |
| Empirical formula                                            | C <sub>18.5</sub> H <sub>18.5</sub> CuN <sub>1.5</sub> O <sub>5.5</sub> S <sub>2</sub> |
| Formula weight                                               | 477.51                                                                                 |
| Temperature/K                                                | 100                                                                                    |
| Crystal system                                               | triclinic                                                                              |
| Space group                                                  | <i>P</i> -1                                                                            |
| <i>a</i> /Å                                                  | 9.960(5)                                                                               |
| <i>b</i> /Å                                                  | 10.210(5)                                                                              |
| <i>c</i> /Å                                                  | 12.060(5)                                                                              |
| $\alpha$ /°                                                  | 102.901(5)                                                                             |
| $\beta$ /°                                                   | 100.793(5)                                                                             |
| $\gamma$ /°                                                  | 113.618(5)                                                                             |
| Volume/Å <sup>3</sup>                                        | 1041.4(8)                                                                              |
| <i>Z</i>                                                     | 2                                                                                      |
| $\rho_{\text{calc}}$ /cm <sup>3</sup>                        | 1.523                                                                                  |
| $\mu$ /mm <sup>-1</sup>                                      | 1.431                                                                                  |
| F(000)                                                       | 490.0                                                                                  |
| Crystal size/mm <sup>3</sup>                                 | 0.22 × 0.15 × 0.1                                                                      |
| Radiation                                                    | synchrotron ( $\lambda = 0.82653$ )                                                    |
| 2 $\Theta$ range for data collection/°                       | 5.368 to 67.692                                                                        |
| Index ranges                                                 | -13 ≤ <i>h</i> ≤ 12, -12 ≤ <i>k</i> ≤ 12, -16 ≤ <i>l</i> ≤ 16                          |
| Reflections collected                                        | 3976                                                                                   |
| Independent reflections                                      | 3976 [ <i>R</i> <sub>int</sub> = ?, <i>R</i> <sub>sigma</sub> = 0.0641]                |
| Data/restraints/parameters                                   | 3976/1/276                                                                             |
| Goodness-of-fit on F <sup>2</sup>                            | 1.055                                                                                  |
| Final <i>R</i> indexes [ <i>I</i> ≥ 2 $\sigma$ ( <i>I</i> )] | <i>R</i> <sub>1</sub> = 0.0710, <i>wR</i> <sub>2</sub> = 0.2099                        |
| Final <i>R</i> indexes [all data]                            | <i>R</i> <sub>1</sub> = 0.0753, <i>wR</i> <sub>2</sub> = 0.2146                        |
| Largest diff. peak/hole / e Å <sup>-3</sup>                  | 1.68/-0.74                                                                             |

**Table S2.** Data collection and structure refinement for **2**

|                                                              |                                                                                                       |
|--------------------------------------------------------------|-------------------------------------------------------------------------------------------------------|
| Identification code                                          | <b>2</b>                                                                                              |
| Empirical formula                                            | C <sub>39</sub> H <sub>28.33</sub> Cu <sub>2</sub> N <sub>2.33</sub> O <sub>8.33</sub> S <sub>4</sub> |
| Formula weight                                               | 918.29                                                                                                |
| Temperature/K                                                | 100                                                                                                   |
| Crystal system                                               | triclinic                                                                                             |
| Space group                                                  | <i>P</i> -1                                                                                           |
| <i>a</i> /Å                                                  | 10.390(6)                                                                                             |
| <i>b</i> /Å                                                  | 21.680(6)                                                                                             |
| <i>c</i> /Å                                                  | 21.910(6)                                                                                             |
| $\alpha$ /°                                                  | 115.86(5)                                                                                             |
| $\beta$ /°                                                   | 103.91(5)                                                                                             |
| $\gamma$ /°                                                  | 93.65(5)                                                                                              |
| Volume/Å <sup>3</sup>                                        | 4230(3)                                                                                               |
| <i>Z</i>                                                     | 3                                                                                                     |
| $\rho_{\text{calc}}/\text{cm}^3$                             | 1.081                                                                                                 |
| $\mu/\text{mm}^{-1}$                                         | 1.422                                                                                                 |
| F(000)                                                       | 1402.0                                                                                                |
| Crystal size/mm <sup>3</sup>                                 | 0.24 × 0.23 × 0.21                                                                                    |
| Radiation                                                    | synchrotron ( $\lambda = 0.82643$ )                                                                   |
| 2 $\Theta$ range for data collection/°                       | 2.474 to 67.626                                                                                       |
| Index ranges                                                 | -13 ≤ <i>h</i> ≤ 13, -25 ≤ <i>k</i> ≤ 25, -28 ≤ <i>l</i> ≤ 29                                         |
| Reflections collected                                        | 38580                                                                                                 |
| Independent reflections                                      | 16297 [ <i>R</i> <sub>int</sub> = 0.1310, <i>R</i> <sub>sigma</sub> = 0.1583]                         |
| Data/restraints/parameters                                   | 16297/46/751                                                                                          |
| Goodness-of-fit on F <sup>2</sup>                            | 0.940                                                                                                 |
| Final <i>R</i> indexes [ <i>I</i> ≥ 2 $\sigma$ ( <i>I</i> )] | <i>R</i> <sub>1</sub> = 0.0973, <i>wR</i> <sub>2</sub> = 0.2659                                       |
| Final <i>R</i> indexes [all data]                            | <i>R</i> <sub>1</sub> = 0.1629, <i>wR</i> <sub>2</sub> = 0.3106                                       |
| Largest diff. peak/hole / e Å <sup>-3</sup>                  | 0.73/-1.10                                                                                            |

**Table S3.** Data collection and structure refinement for **3**

|                                                              |                                                                              |
|--------------------------------------------------------------|------------------------------------------------------------------------------|
| Identification code                                          | <b>3</b>                                                                     |
| Empirical formula                                            | C <sub>18</sub> H <sub>12</sub> NO <sub>4</sub> S <sub>2</sub> Cu            |
| Formula weight                                               | 433.95                                                                       |
| Temperature/K                                                | 293(2)                                                                       |
| Crystal system                                               | monoclinic                                                                   |
| Space group                                                  | <i>C2/c</i>                                                                  |
| <i>a</i> /Å                                                  | 24.3747(7)                                                                   |
| <i>b</i> /Å                                                  | 13.9313(3)                                                                   |
| <i>c</i> /Å                                                  | 18.9465(7)                                                                   |
| $\alpha$ /°                                                  | 90                                                                           |
| $\beta$ /°                                                   | 111.435(4)                                                                   |
| $\gamma$ /°                                                  | 90                                                                           |
| Volume/Å <sup>3</sup>                                        | 5988.7(3)                                                                    |
| <i>Z</i>                                                     | 13                                                                           |
| $\rho_{\text{calc}}/\text{cm}^3$                             | 1.564                                                                        |
| $\mu/\text{mm}^{-1}$                                         | 1.434                                                                        |
| F(000)                                                       | 2860.0                                                                       |
| Crystal size/mm <sup>3</sup>                                 | 0.02 × 0.02 × 0.15                                                           |
| Radiation                                                    | MoK $\alpha$ ( $\lambda$ = 0.71073)                                          |
| 2 $\Theta$ range for data collection/°                       | 3.752 to 62.85                                                               |
| Index ranges                                                 | -24 ≤ <i>h</i> ≤ 35, -20 ≤ <i>k</i> ≤ 19, -27 ≤ <i>l</i> ≤ 26                |
| Reflections collected                                        | 35765                                                                        |
| Independent reflections                                      | 9032 [ <i>R</i> <sub>int</sub> = 0.0326, <i>R</i> <sub>sigma</sub> = 0.0319] |
| Data/restraints/parameters                                   | 9032/0/294                                                                   |
| Goodness-of-fit on F <sup>2</sup>                            | 1.069                                                                        |
| Final <i>R</i> indexes [ <i>I</i> ≥ 2 $\sigma$ ( <i>I</i> )] | <i>R</i> <sub>1</sub> = 0.0619, <i>wR</i> <sub>2</sub> = 0.1775              |
| Final <i>R</i> indexes [all data]                            | <i>R</i> <sub>1</sub> = 0.0747, <i>wR</i> <sub>2</sub> = 0.1854              |
| Largest diff. peak/hole / e Å <sup>-3</sup>                  | 1.64/-0.85                                                                   |

**Table S4.** Data collection and structure refinement for **4**

|                                                              |                                                                                               |
|--------------------------------------------------------------|-----------------------------------------------------------------------------------------------|
| Identification code                                          | <b>4</b>                                                                                      |
| Empirical formula                                            | C <sub>34</sub> H <sub>24</sub> Cu <sub>2</sub> N <sub>6</sub> O <sub>10</sub> S <sub>2</sub> |
| Formula weight                                               | 867.79                                                                                        |
| Temperature/K                                                | 180                                                                                           |
| Crystal system                                               | monoclinic                                                                                    |
| Space group                                                  | <i>P2<sub>1</sub>/m</i>                                                                       |
| <i>a</i> /Å                                                  | 8.9361(4)                                                                                     |
| <i>b</i> /Å                                                  | 24.6960(15)                                                                                   |
| <i>c</i> /Å                                                  | 10.4597(4)                                                                                    |
| $\alpha$ /°                                                  | 90                                                                                            |
| $\beta$ /°                                                   | 110.946(4)                                                                                    |
| $\gamma$ /°                                                  | 90                                                                                            |
| Volume/Å <sup>3</sup>                                        | 2155.77(19)                                                                                   |
| <i>Z</i>                                                     | 2                                                                                             |
| $\rho_{\text{calc}}/\text{cm}^3$                             | 1.337                                                                                         |
| $\mu/\text{mm}^{-1}$                                         | 1.716                                                                                         |
| F(000)                                                       | 880.0                                                                                         |
| Crystal size/mm <sup>3</sup>                                 | 0.1 × 0.1 × 0.01                                                                              |
| Radiation                                                    | MoK $\alpha$ ( $\lambda = 0.71073$ )                                                          |
| 2 $\Theta$ range for data collection/°                       | 4.17 to 50.054                                                                                |
| Index ranges                                                 | -10 ≤ <i>h</i> ≤ 9, -29 ≤ <i>k</i> ≤ 29, -10 ≤ <i>l</i> ≤ 12                                  |
| Reflections collected                                        | 3908                                                                                          |
| Independent reflections                                      | 3908 [ <i>R</i> <sub>int</sub> = ?, <i>R</i> <sub>sigma</sub> = 0.0277]                       |
| Data/restraints/parameters                                   | 3908/136/281                                                                                  |
| Goodness-of-fit on <i>F</i> <sup>2</sup>                     | 1.068                                                                                         |
| Final <i>R</i> indexes [ <i>I</i> ≥ 2 $\sigma$ ( <i>I</i> )] | <i>R</i> <sub>1</sub> = 0.0880, <i>wR</i> <sub>2</sub> = 0.2652                               |
| Final <i>R</i> indexes [all data]                            | <i>R</i> <sub>1</sub> = 0.1039, <i>wR</i> <sub>2</sub> = 0.2797                               |
| Largest diff. peak/hole / e Å <sup>-3</sup>                  | 0.90/-0.54                                                                                    |

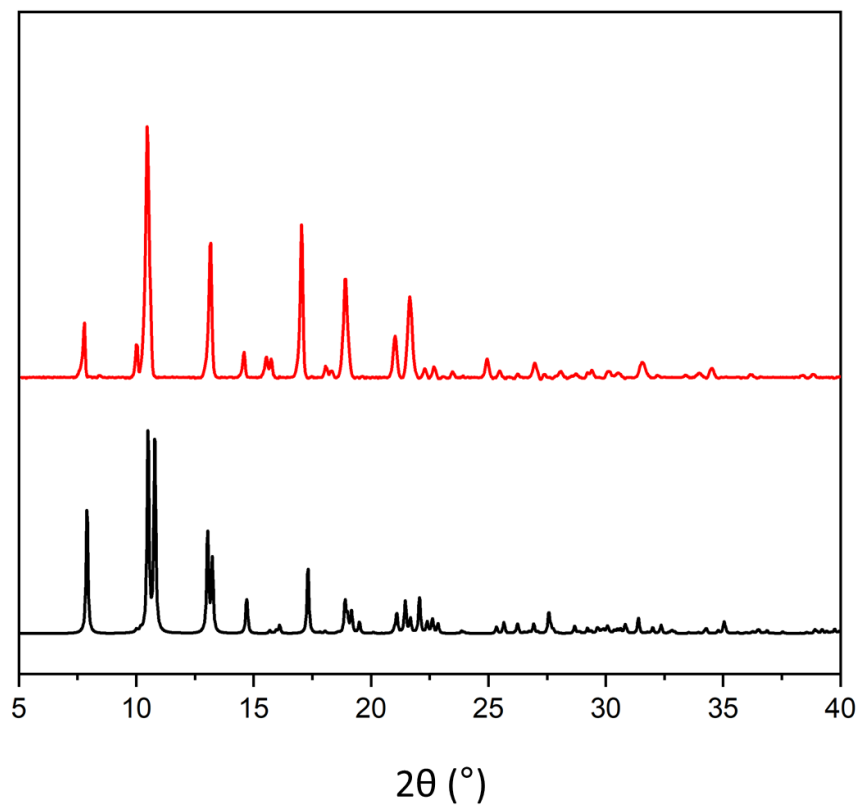

**Figure S1.** XRPD patterns of as-synthesized (red) and simulated (black) compound 1.

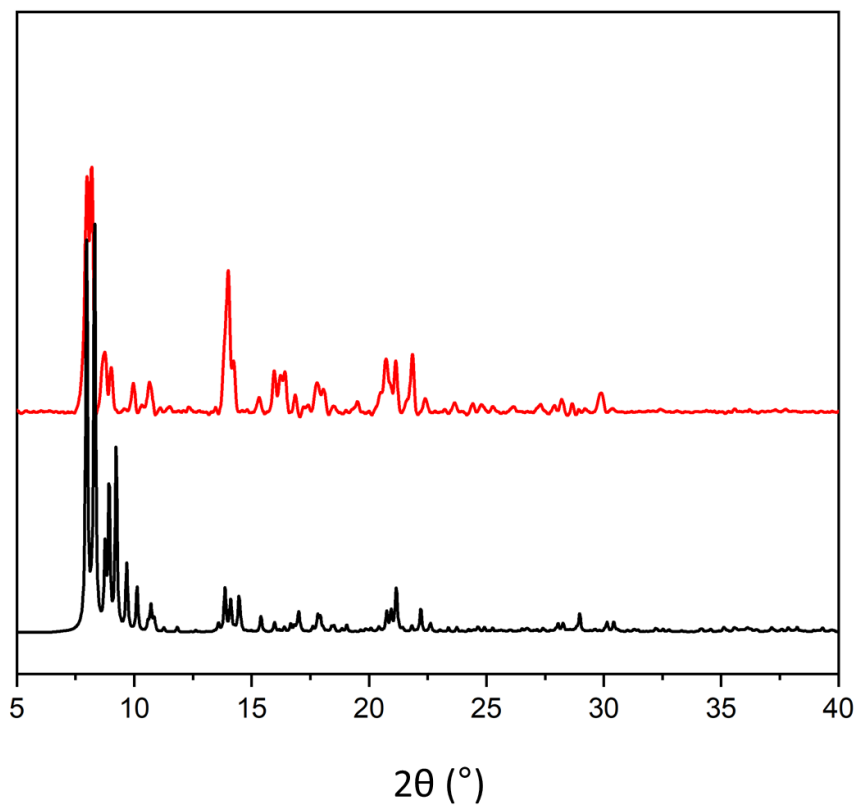

**Figure S2.** XRPD patterns of as-synthesized (red) and simulated (black) compound 2.

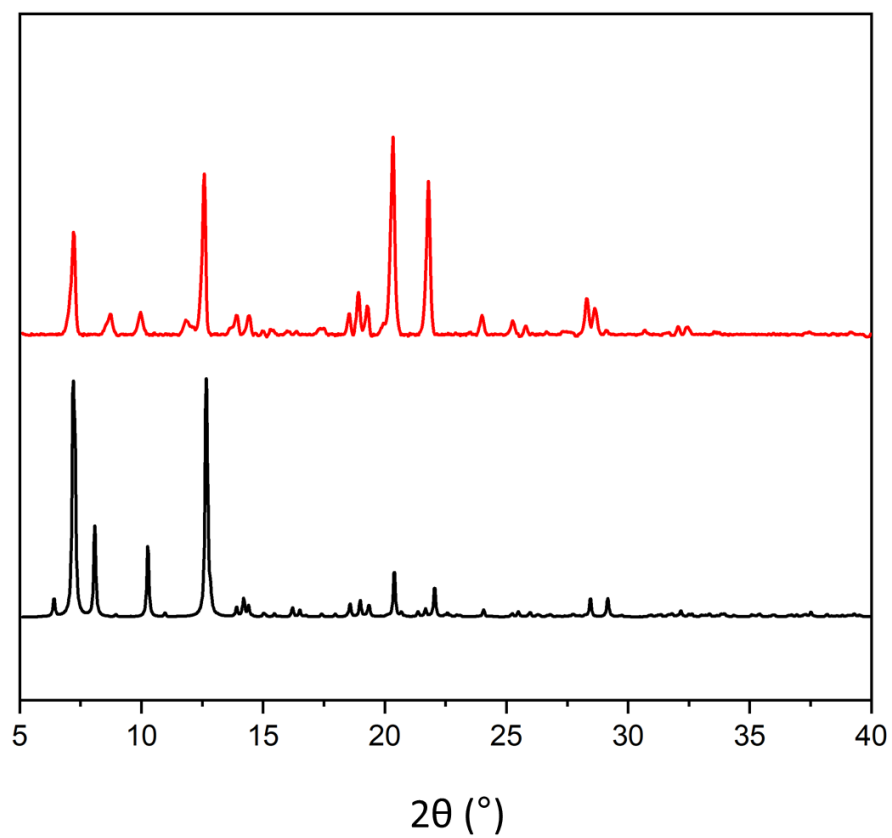

**Figure S3.** XRPD patterns of as-synthesized (red) and simulated (black) compound **3**.



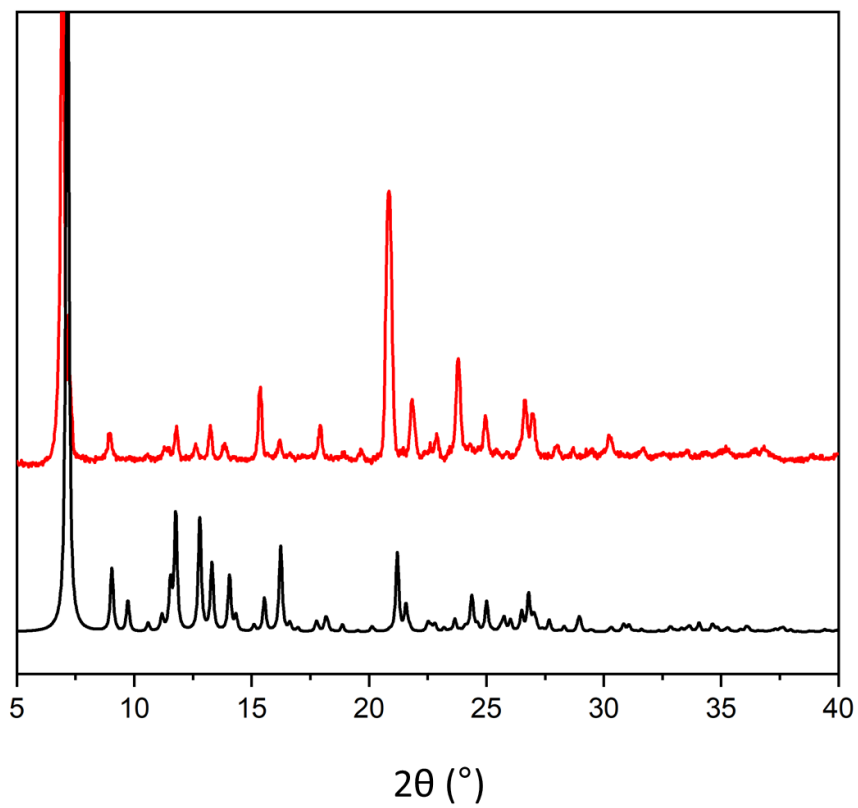

**Figure S4.** XRPD patterns of as-synthesized (red) and simulated (black) compound 4.

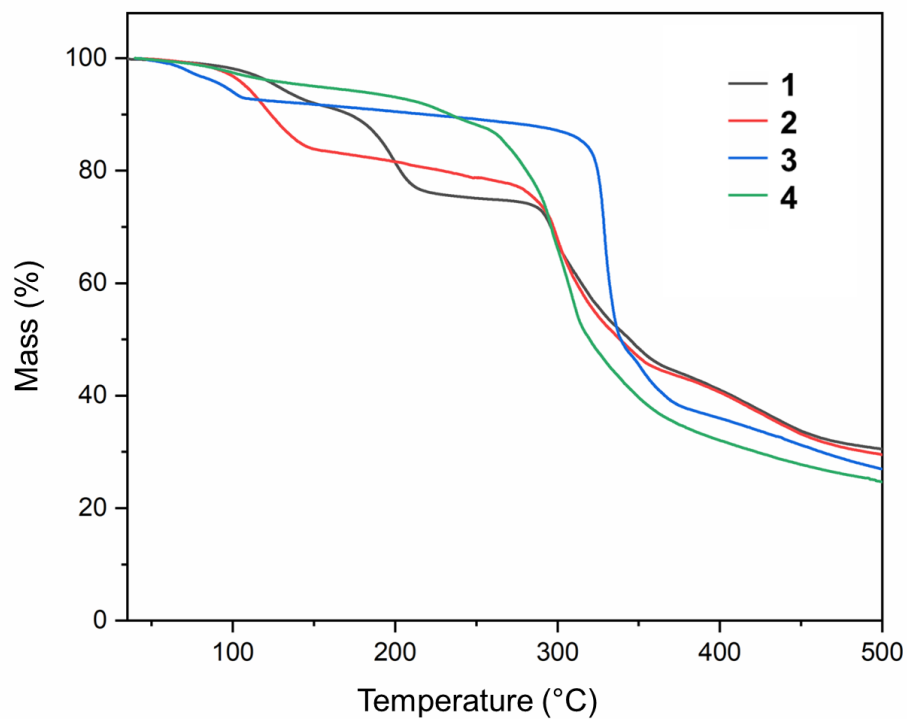

**Figure S5.** TGA curves of compounds **1-4** before solvent exchange in N<sub>2</sub> atmosphere with a heating rate of 5 °C min<sup>-1</sup>.

**Table S5.** TGA data for compounds for compounds **1-4**

| Compound | Proposed formula                                                                                   | Temperature range (°C) | % Mass loss (calc.) | Mass loss assignment |
|----------|----------------------------------------------------------------------------------------------------|------------------------|---------------------|----------------------|
| 1        | [Cu(4,4'-DTBA)(DMF)] <sub>n</sub> · 0.5DMF                                                         | 80-145                 | 7.5 (7.7)           | 0.5 DMF              |
|          |                                                                                                    | 160-220                | 16.3 (15.3)         | 1 DMF                |
|          |                                                                                                    | 275                    | 69.4                | decomposition        |
| 2        | [Cu(4,4'-DTBA)(py)] <sub>n</sub> · 0.33DMF                                                         | 70-275                 | 77.9 (78.0)         | py + 0.33 DMF        |
|          |                                                                                                    | 275                    | 70.5                | decomposition        |
| 3        | [Cu <sub>2</sub> (4,4'-DTBA) <sub>2</sub> (4,4'-bpy)] <sub>n</sub> · 2DMF                          | 40-300                 | 13.9 (14.1)         | 2 DMF                |
|          |                                                                                                    | 300                    | 73.1                | decomposition        |
| 4        | [Cu <sub>2</sub> (NO <sub>3</sub> ) <sub>2</sub> (4,4'-DTBA)(4,4'-bpy) <sub>2</sub> ] <sub>n</sub> | 250                    | 72.5                | decomposition        |

**Table S6.** Selected bond lengths and angles for compounds **1-4** and previously reported  $[\text{Cu}_2(4,4'\text{-DTBA})(\text{H}_2\text{O})_2]_n$  coordination polymers<sup>1</sup>

|                                                                                                                | Cu-Cu<br>(Å)         | Cu-O<br>(Å)                                                                                  | Cu-N<br>(Å)                      | S-S<br>(Å)                       | C-S-S<br>(°)                                                         | C-S-S-C<br>torsion<br>angle<br>(°) | Dihedral<br>angle<br>(°)       |
|----------------------------------------------------------------------------------------------------------------|----------------------|----------------------------------------------------------------------------------------------|----------------------------------|----------------------------------|----------------------------------------------------------------------|------------------------------------|--------------------------------|
| <b>1</b><br>[Cu(4,4'-DTBA)(DMF)] <sub>n</sub>                                                                  | 2.633(13)            | 1.951(3)<br>1.964(3)<br>1.965(3)<br>1.979(3)<br>2.146(4)                                     |                                  | 2.033(2)                         | 105.50(18)<br>105.59(19)                                             | 69.8(3)                            | 70.1(2)                        |
| <b>2</b><br>[Cu(4,4'-DTBA)(py)] <sub>n</sub>                                                                   | 2.635(2)<br>2.645(2) | 1.949(6)<br>1.954(6)<br>1.964(6)<br>1.968(6)<br>1.970(7)<br>1.978(5)<br>1.990(5)<br>1.999(6) | 2.165(7)<br>2.173(7)<br>2.181(7) | 2.015(5)<br>2.025(3)<br>2.036(4) | 102.0(3)<br>103.0(4)<br>105.4(3)<br>105.5(4)<br>105.6(3)<br>105.8(3) | 78.6(5)<br>83.6(6)<br>85.4(5)      | 75.0(4)<br>87.6(4)<br>100.0(3) |
| <b>3</b><br>[Cu <sub>2</sub> (4,4'-DTBA) <sub>2</sub> (4,4'-bpy)] <sub>n</sub>                                 | 2.623(6)             | 1.947(2)<br>1.956(2)<br>1.964(2)<br>2.022(2)                                                 | 2.126(3)<br>2.135(3)             | 2.022(11)                        | 104.94(11)<br>105.04(11)                                             | 78.0(2)                            | 82.81(12)                      |
| <b>4</b><br>[Cu <sub>2</sub> (NO <sub>3</sub> ) <sub>2</sub> (4,4'-DTBA)(4,4'-bpy) <sub>2</sub> ] <sub>n</sub> |                      | 1.915(13)<br>2.030(2)<br>2.066(7)<br>2.102(16)<br>2.264(14)                                  | 2.017(6)<br>2.019(5)             | 1.374(13)                        | 128.9(6)<br>129.6(6)                                                 | 75.6(2)                            | 84.6(6)                        |
| [Cu <sub>2</sub> (4,4'-DTBA)(H <sub>2</sub> O) <sub>2</sub> ] <sub>n</sub><br>(1D)                             | 2.647(2)             | 1.958(4)<br>1.972(6)                                                                         |                                  | 2.023(2)                         | 105.92(2)                                                            | 73.64(2)                           | 73.02(3)                       |
| [Cu <sub>2</sub> (4,4'-DTBA)(H <sub>2</sub> O) <sub>2</sub> ] <sub>n</sub><br>(2D)                             | 2.609(1)             | 1.951(4)<br>1.958(4)<br>1.974(4)<br>1.983(4)<br>2.150(4)                                     |                                  | 2.020(2)                         | 105.23(2)<br>105.98(2)                                               | 91.10(3)                           | 78.40(3)                       |

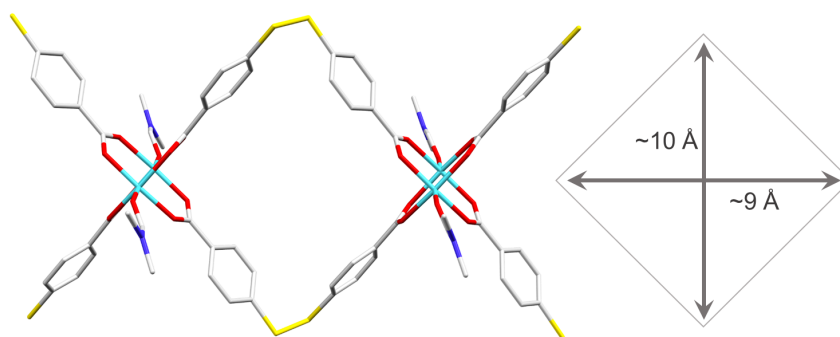

**Figure S6.** View of the square cavities formed in **1** showing the pore aperture dimensions.

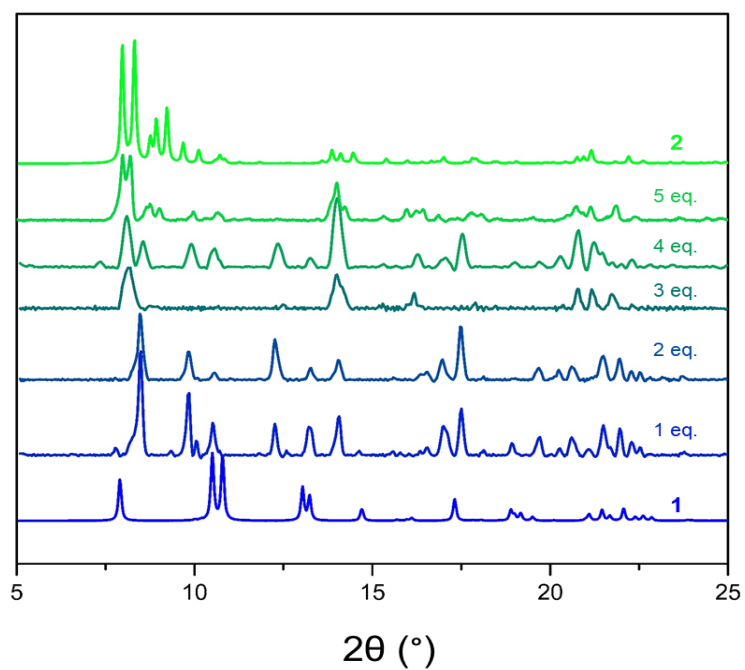

**Figure S7.** XRPD patterns of the solids obtained after reacting  $\text{Cu}(\text{NO}_3)_2$  and 4,4'-DTBA in the presence of 1-5 equivalents of pyridine, compared with simulated patterns for **1** and **2**.

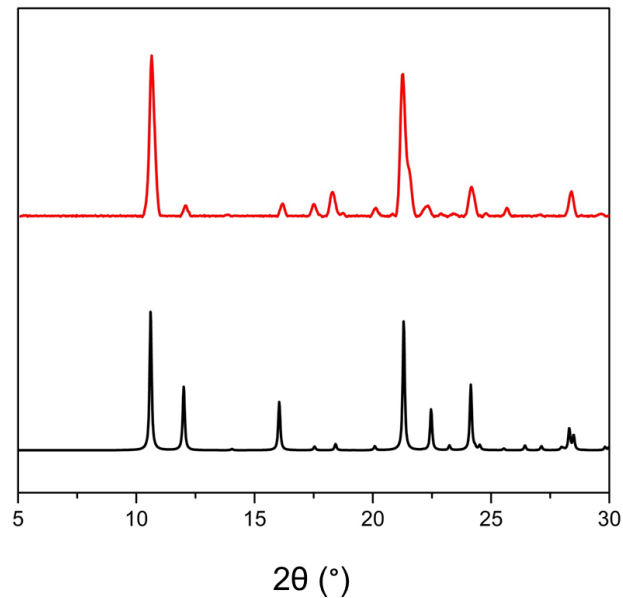

**Figure S8.** XRPD patterns of as-synthesized (red) and simulated (black)  $[\text{Cu}(\text{py})_4(\text{NO}_3)_2] \cdot 2\text{py}$  complex.<sup>2</sup>

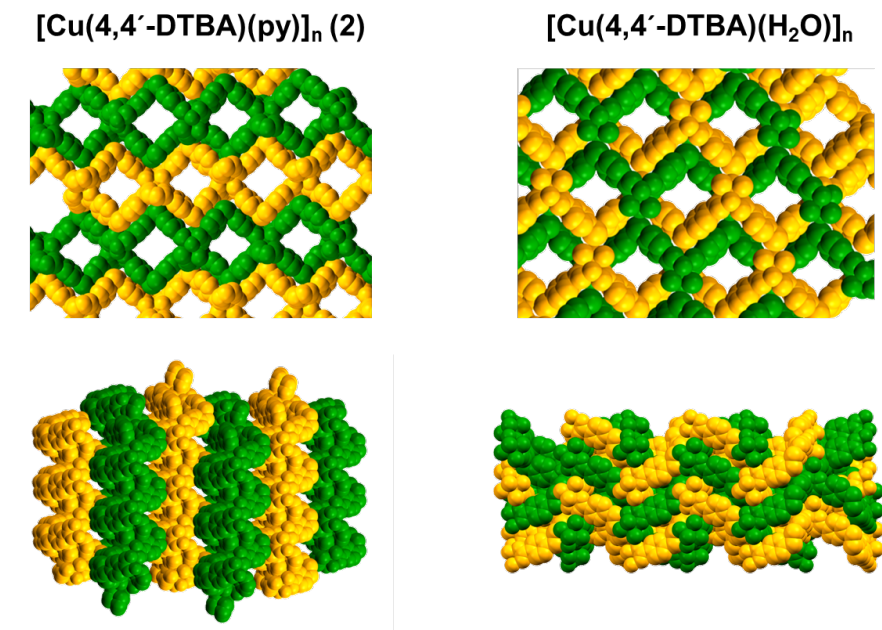

**Figure S9.** Space filling models of non-interpenetrated **2** (left) and previously reported 2-fold interpenetrated  $[\text{Cu}_2(4,4'\text{-DTBA})(\text{H}_2\text{O})_2]_n$ <sup>1</sup> (right) showing the crystal packing of 2D layers in which the various colours differentiates the contiguous layers.

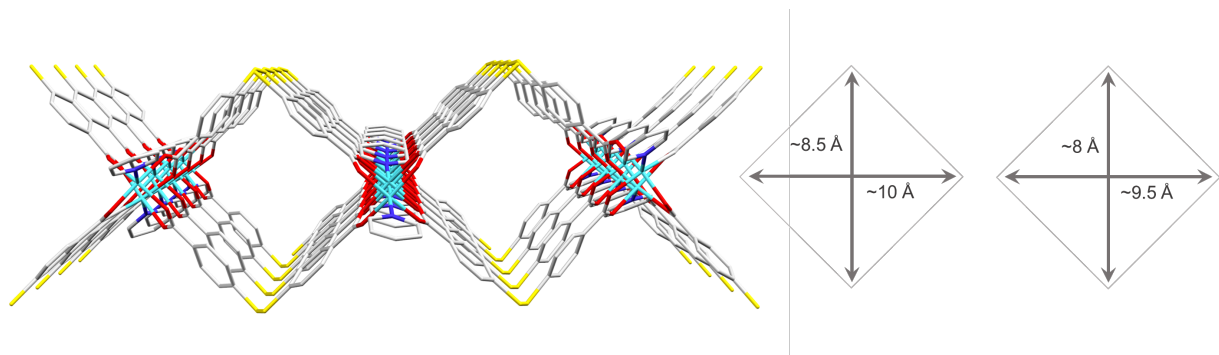

**Figure S10.** View of the square channels formed in **2** showing the pore aperture dimensions.

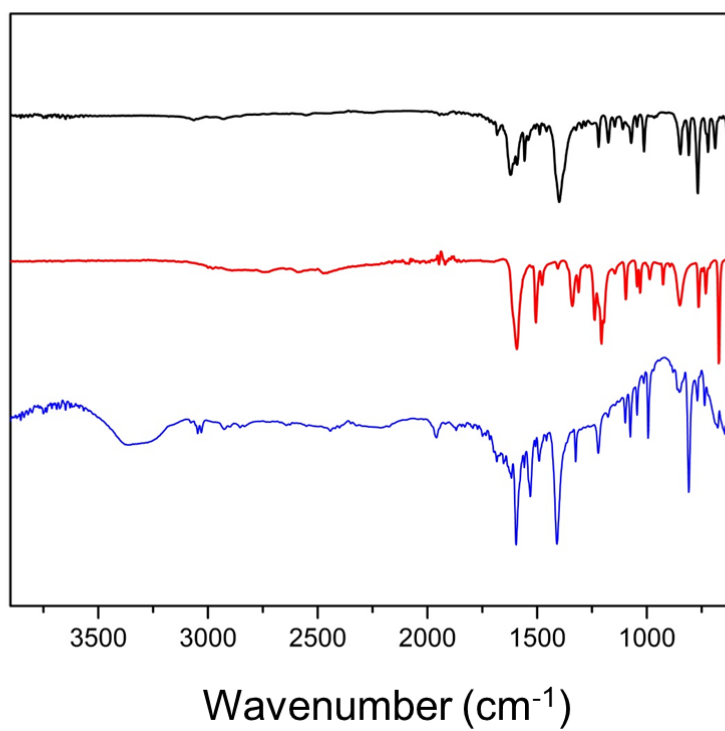

**Figure S11.** FT-IR spectra of **3'** (black), 4,4'-DTBA (red) and 4,4'-bpy (blue).

**Table S7.** CHNS Elemental analysis of **3'** and theoretical values for a  $\text{Cu}_2(4,4'\text{-DTBA})_2(4,4'\text{-bpy})$  composition

|                                                                       | C (%) | H (%) | N (%) | S (%) |
|-----------------------------------------------------------------------|-------|-------|-------|-------|
| <b>3'</b>                                                             | 50.77 | 2.64  | 3.08  | 14.19 |
| $\text{C}_{19}\text{H}_{12}\text{CuNO}_4\text{S}_2$ ( <i>calcd.</i> ) | 51.17 | 2.71  | 3.14  | 14.38 |

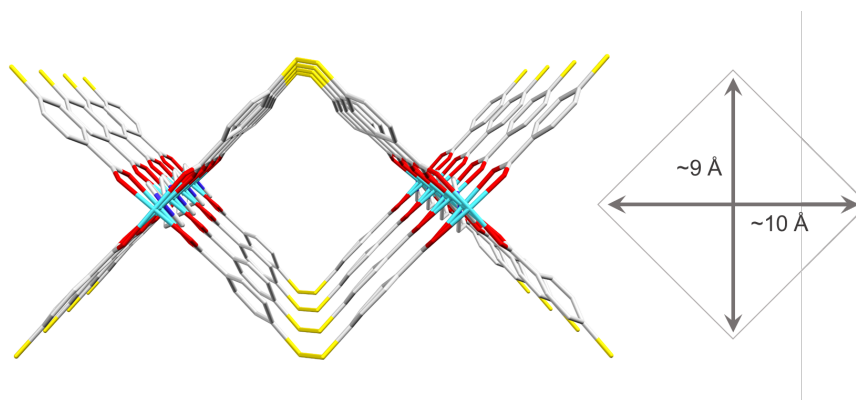

**Figure S12.** View of the square channels formed in **3** showing the pore aperture dimensions.

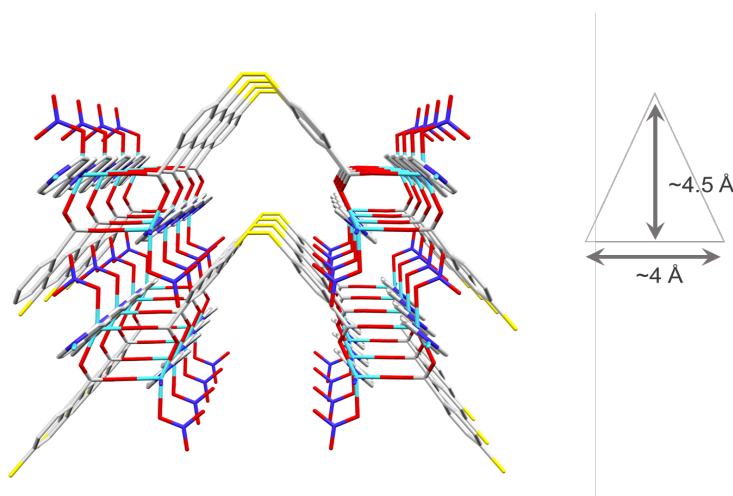

**Figure S13.** View of the triangular pore aperture of 2D porous channels in **4** showing the pore aperture dimensions.

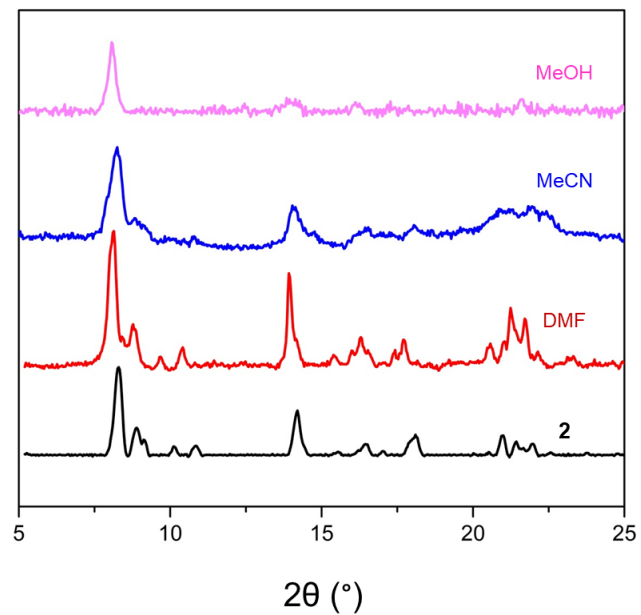

**Figure S14.** XRPD patterns of **2** after immersing in various solvents for 48 h at room temperature.

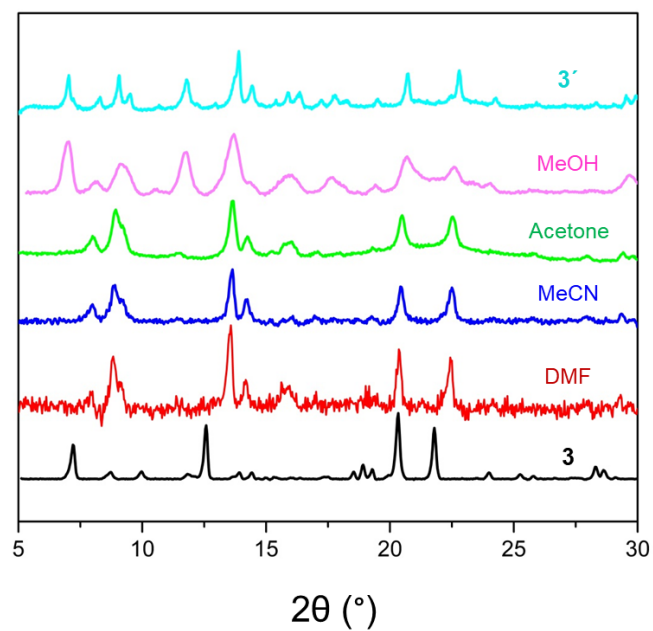

**Figure S15.** XRPD patterns of **3** after immersing in various solvents 48 h at room temperature.



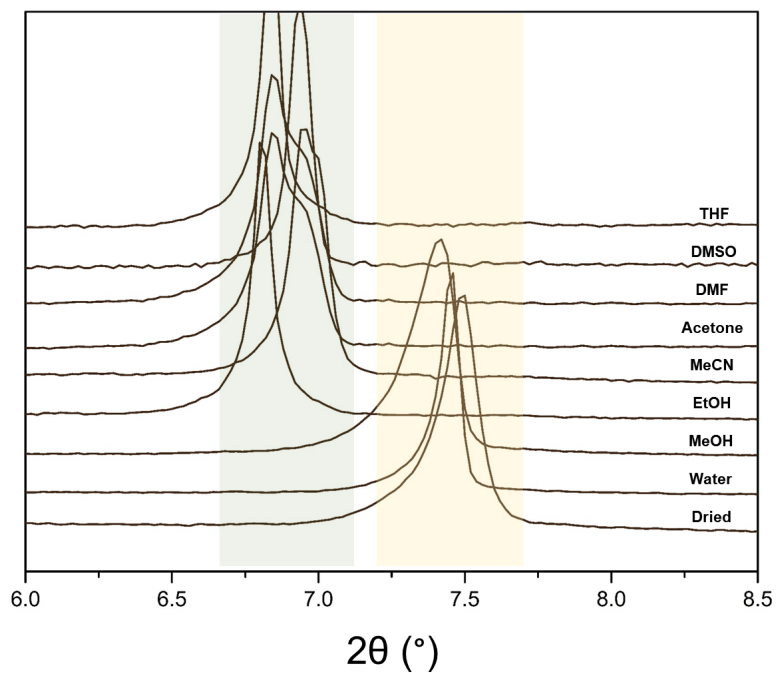

**Figure S16.** Zoom of the recorded XRPD patterns of **4'** before (dried) and after immersion in water and several organic solvents in the region  $6^\circ < 2\theta < 8.5^\circ$ .

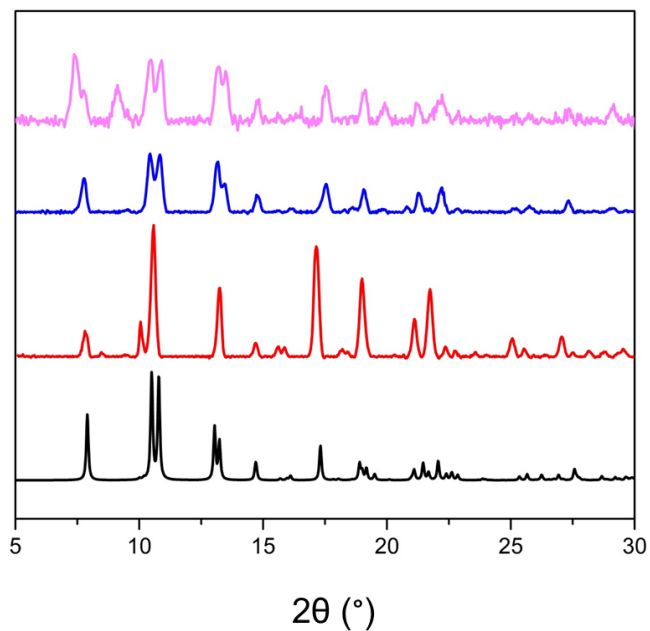

**Figure S17.** XRPD patterns of simulated (black) and as-synthesized (red) **1** compared to the ones obtained after heating **1** at 85 °C (blue) and 120 °C (pink) under vacuum for 24 h.

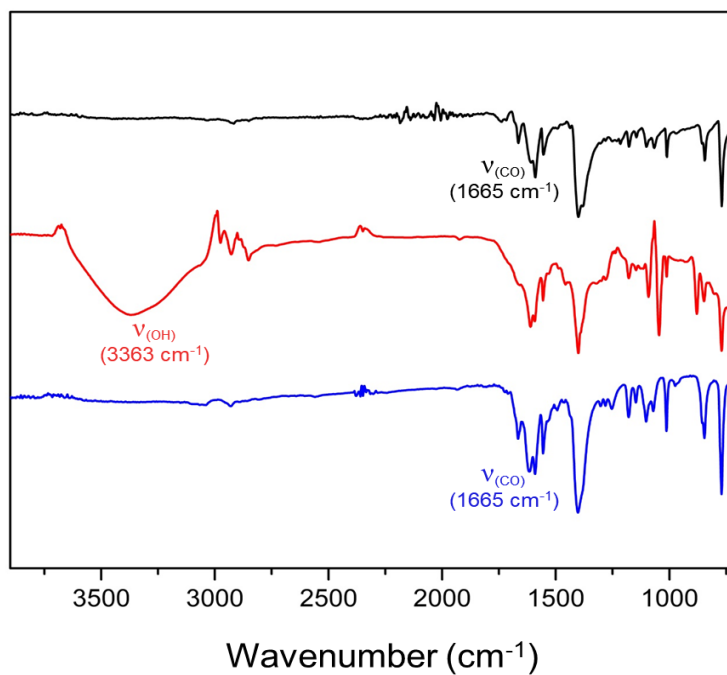

**Figure S18.** FT-IR spectra of **1** before (black) and after immersing in MeOH (**1'**, red) and after heating **1'** at 85 °C for 24 h in DMF (**1**, blue).

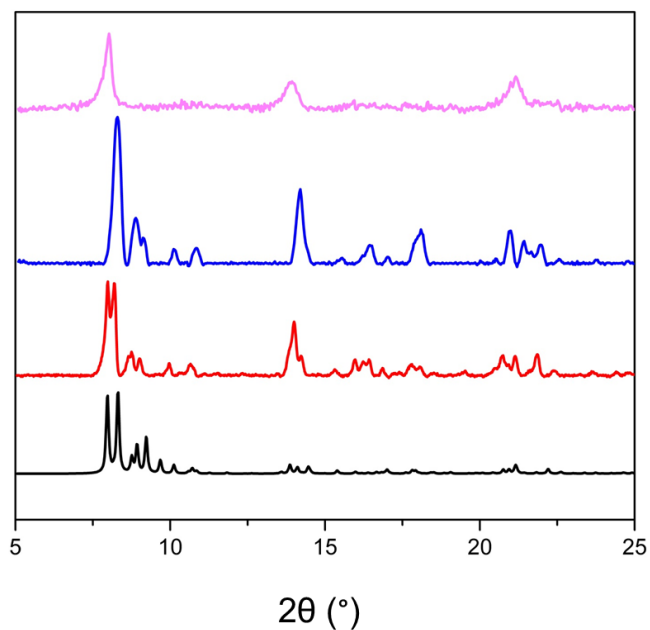

**Figure S19.** XRPD patterns of simulated (black) and as-synthesized (red) **2** compared to the ones obtained after heating **2** at 85 °C (blue) and 120 °C (pink) under vacuum for 24 h.

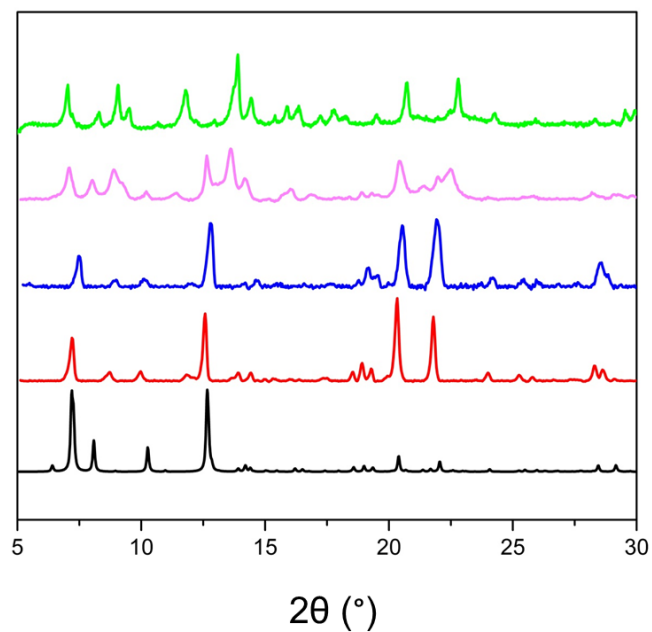

**Figure S20.** XRPD patterns of simulated (black) and as-synthesized (red) **3** compared to the ones obtained after heating **3** at 85 °C (blue) and 120 °C (pink) under vacuum for 24 h and as-synthesized **3'** (green).

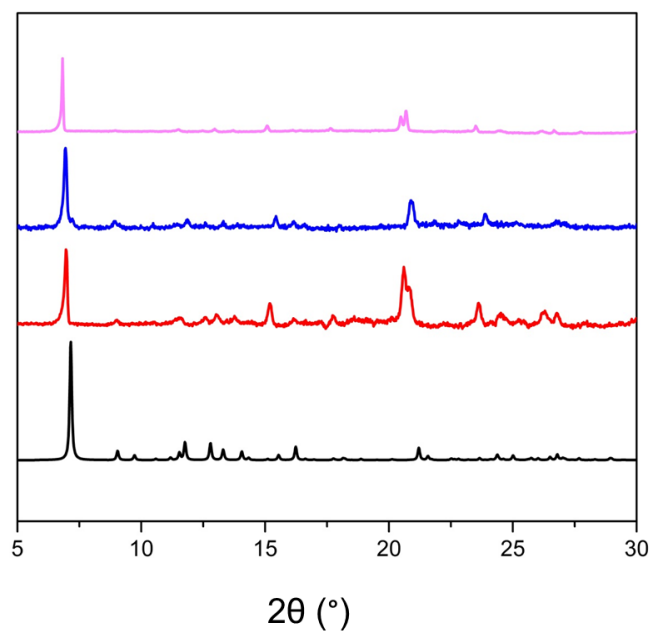

**Figure S21.** XRPD patterns of simulated (black) and as-synthesized (red) **4** compared to the ones obtained after heating **4** at 85 °C (blue) and 120 °C (pink) under vacuum for 24 h.

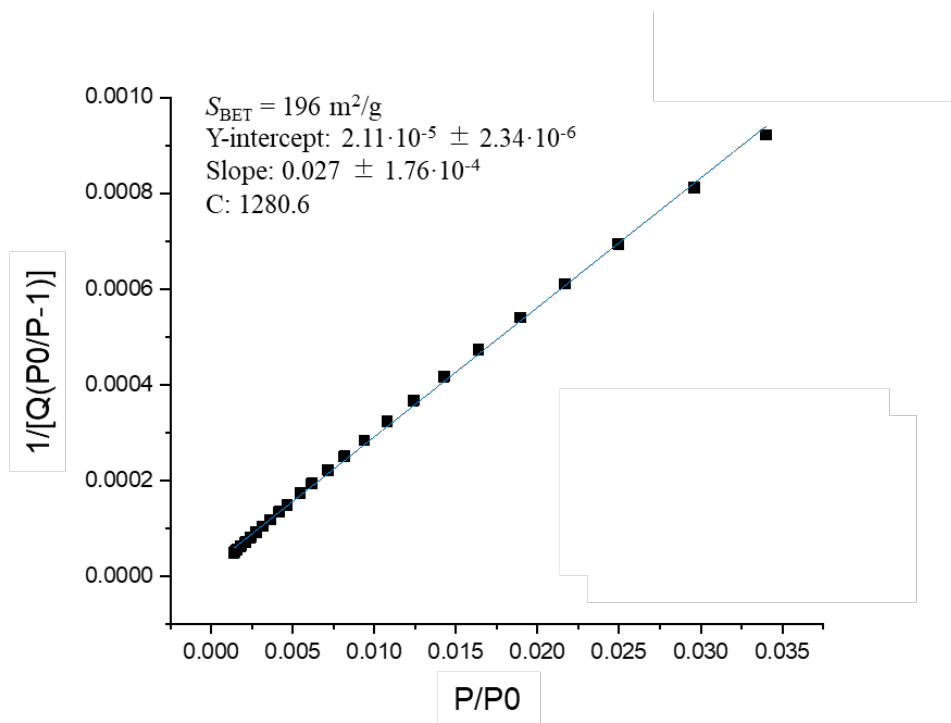

**Figure S22.** BET surface area plot for **1'**.

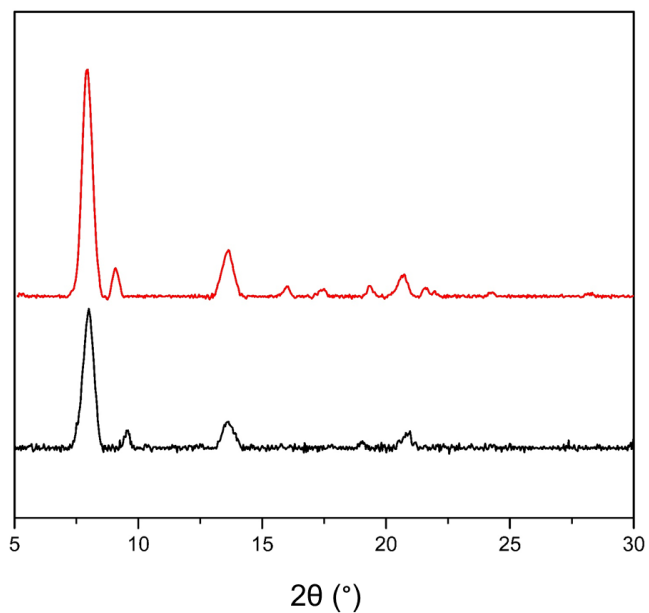

**Figure S23.** XRPD patterns of **1'** before (black) and after (red) adsorption. The sample was activated at 85 °C under vacuum for 12 h prior adsorption experiments

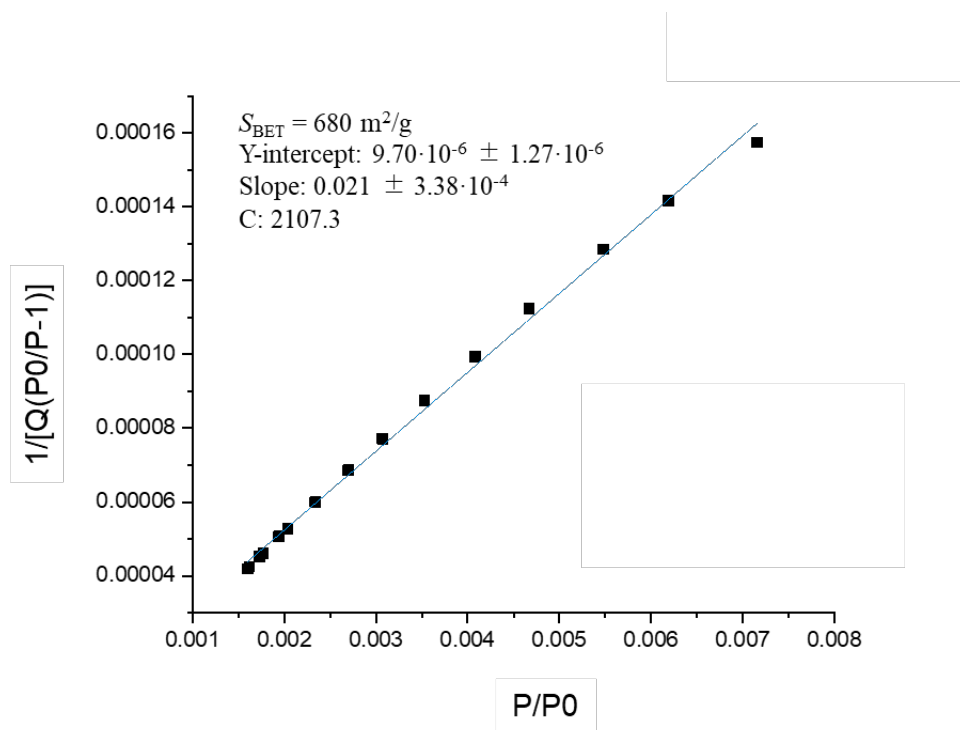

**Figure S24.** BET surface area plot for 3'.

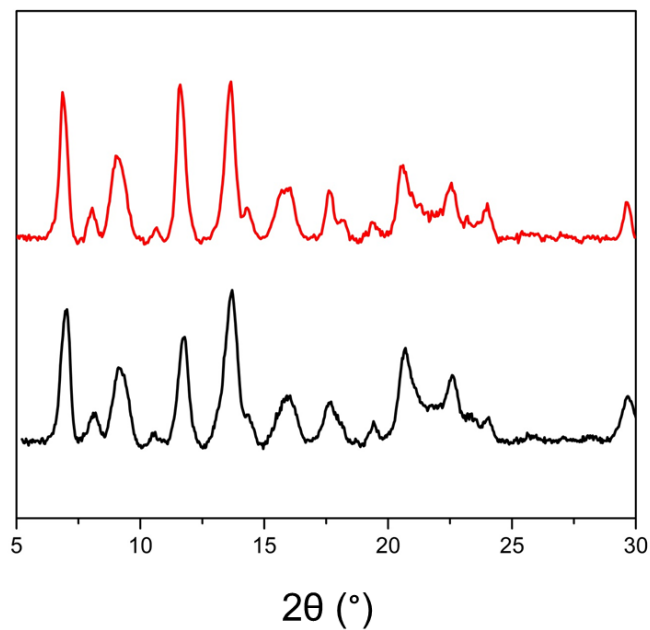

**Figure S25.** XRPD patterns of 3' before (black) and after (red) adsorption. The sample was activated at 85 °C under vacuum for 12 h prior adsorption experiments.

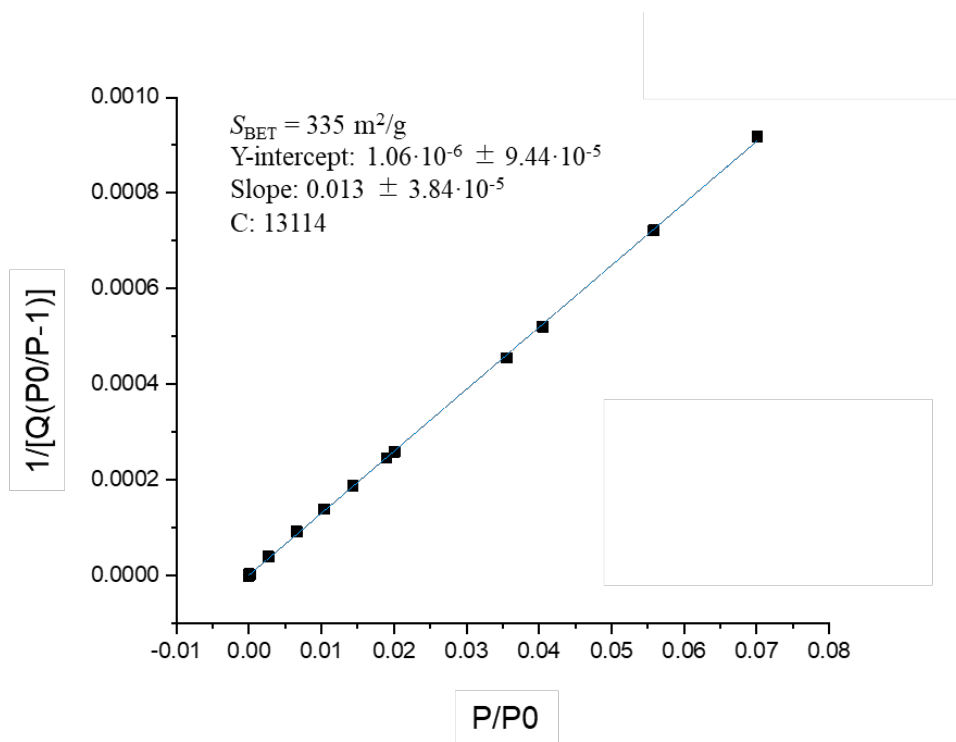

**Figure S26.** BET surface area plot for 4'.

### References:

- (1) O.Veselska, L. Cai, D.Podbevšek, G. Ledoux, N.Guillou, G. Pilet, A. Fateeva, A. Demessence, *Inorg. Chem.*, 2018, **57**, 2736-2743.
- (2) D. V.Soldatov, G. D.Enright, J. A. Ripmeester, J. Lipkowski, E. A.Ukrainitseva, *J. Supramol. Chem.*, 2001, **1**, 245-251.
